# Supplementary material
Source: MDPI journal article supplement (https://www.mdpi.com/2071-1050/14/1/566)
Supplement: s1 [file s1 › sustainability-1493620-supplementary.pdf]

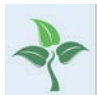**Table S1.** Conceptual framework definitions(DESAs 2001; (RAE, 2016).

| Sustainability themes                        | Definition based on SDGs, SD indicators and challenges                                                                                                                                                      |
|----------------------------------------------|-------------------------------------------------------------------------------------------------------------------------------------------------------------------------------------------------------------|
| Water quality/quantity                       | Providing innovative engineering solutions to reduce plastic pollution and access to the needed infrastructure for clean water, sanitation and hygiene for millions of underserved people in the world      |
| Climate change                               | Protecting the world assets from the effects of climate change by developing resilient infrastructure that can withstand severe climate impacts and its resultant effect on populations                     |
| Material consumption & production/energy use | Ensuring sustainable consumption and production patterns by implementing engineering eco-efficiency measures to achieve zero waste, a significant cut to energy usage and carbon emissions from energy      |
| Waste management                             | Ensuring a reduction or elimination of hazardous reactive waste, and improving waste recycling and reuse                                                                                                    |
| Biodiversity                                 | Incorporating ethics and solid values to innovative development efforts to stop further damage to the planet                                                                                                |
| Economic performance                         | Promoting inclusive and sustainable economic growth and developing technology to improve living standards of all through productive employment and decent work                                              |
| Healthcare                                   | Utilizing technological solutions to provide access to quality healthcare and safe drinking water                                                                                                           |
| Housing conditions                           | Making the right decisions and thinking of the quality of life and health of the planet for the coming centuries, when designing, locating, building and financing urban infrastructure                     |
| Equity                                       | Providing equal opportunities and access to technology for the poorest, most vulnerable and diverse people to access affordable energy, electricity, health and education                                   |
| Population problems                          | Developing sustainable infrastructure and creation of jobs to tackle and reduce the inequalities that arise as a result of the population explosion of major cities in the world especially developing ones |

**Table S2.** Technique for determining sample size (Krejcie & Morgan, 1970).

| N   | S   | N   | S   | N      | S   |
|-----|-----|-----|-----|--------|-----|
| 10  | 10  | 220 | 140 | 1200   | 291 |
| 15  | 14  | 230 | 144 | 1300   | 297 |
| 20  | 19  | 240 | 148 | 1400   | 302 |
| 25  | 24  | 250 | 152 | 1500   | 306 |
| 30  | 28  | 260 | 155 | 1600   | 310 |
| 35  | 32  | 270 | 159 | 1700   | 313 |
| 40  | 36  | 280 | 162 | 1800   | 317 |
| 45  | 40  | 290 | 165 | 1900   | 320 |
| 50  | 44  | 300 | 169 | 2000   | 322 |
| 55  | 48  | 320 | 175 | 2200   | 327 |
| 60  | 52  | 340 | 181 | 2400   | 331 |
| 65  | 56  | 360 | 186 | 2600   | 335 |
| 70  | 59  | 380 | 191 | 2800   | 338 |
| 75  | 63  | 400 | 196 | 3000   | 341 |
| 80  | 66  | 420 | 201 | 3500   | 346 |
| 85  | 70  | 440 | 205 | 4000   | 351 |
| 90  | 73  | 460 | 210 | 4500   | 354 |
| 95  | 76  | 480 | 214 | 5000   | 357 |
| 100 | 80  | 500 | 217 | 6000   | 361 |
| 110 | 86  | 550 | 226 | 7000   | 364 |
| 120 | 92  | 600 | 234 | 8000   | 367 |
| 130 | 97  | 650 | 242 | 9000   | 368 |
| 140 | 103 | 700 | 248 | 10,000 | 370 |
| 150 | 108 | 750 | 254 | 15,000 | 375 |
| 160 | 113 | 800 | 260 | 20,000 | 377 |
| 170 | 118 | 850 | 265 | 30,000 | 379 |

|     |     |      |     |           |     |
|-----|-----|------|-----|-----------|-----|
| 180 | 123 | 900  | 269 | 40,000    | 380 |
| 190 | 127 | 950  | 274 | 50,000    | 381 |
| 200 | 132 | 1000 | 278 | 75,000    | 382 |
| 210 | 136 | 1100 | 285 | 1,000,000 | 384 |

Note.— $N$  is population size.

$S$  is sample size.

**Favourable Opinion-  
First Review**

**Faculty Ethics Committee Headed Paper**  
<ethics-tech@port.ac.uk>

13 August 2018

Applicant Ibifuro Ken-Giami  
Address School of Engineering

Dear Ibifuro

|                                    |                                                                                                                                                             |
|------------------------------------|-------------------------------------------------------------------------------------------------------------------------------------------------------------|
| <b>Study Title:</b>                | <b>Advancing the three pillars of sustainability in the engineering education: A model for attracting female participants to the engineering profession</b> |
| <b>Ethics Committee reference:</b> | <b>I.K-G - 02</b>                                                                                                                                           |

The Ethics Committee reviewed the above application by a discussion forum between the dates of 30 July 2018 and 13 August 2018.

#### **Ethical opinion**

The members of the Committee present gave a favourable ethical opinion of the above research on the basis described in the application form, protocol and supporting documentation, subject to the general conditions set out in the attached document.

The favourable opinion of the EC does not grant permission or approval to undertake the research. Management permission or approval must be obtained from any host organisation, including University of Portsmouth, prior to the start of the study.

#### **Documents reviewed**

The documents reviewed at the meeting were:

| <i>Document</i>                  | <i>Version</i> | <i>Date</i>    |
|----------------------------------|----------------|----------------|
| Application form                 | V2             | 13 August 2018 |
| Invitation Letter                | V1             | 13 August 2018 |
| Participant Information Sheet    | V1             | 13 August 2018 |
| Consent Form                     | V1             | 13 August 2018 |
| Interview Questions / Topic List | V1             | 13 August 2018 |
| Questionnaire                    | V1             | 13 August 2018 |
|                                  |                |                |
|                                  |                |                |

**Statement of compliance**

The Committee is constituted in accordance with the Governance Arrangements set out by the University of Portsmouth

**After ethical review**

Reporting and other requirements

The attached document acts as a reminder that research should be conducted with integrity and gives detailed guidance on reporting requirements for studies with a favourable opinion, including:

- Notifying substantial amendments
- Notification of serious breaches of the protocol
- Progress reports
- Notifying the end of the study

Feedback

You are invited to give your view of the service that you have received from the Faculty Ethics Committee. If you wish to make your views known please contact the administrator <ethics-tech@port.ac.uk>

**Please quote this number on all correspondence: I.K-G- 02**

Yours sincerely and wishing you every success in your research

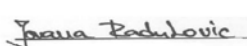

Jovana Radulovic  
**Co-Chair**  
 Email: ethics-tech@port.ac.uk

Enclosures: *"After ethical review – guidance for researchers"*

Copy to: *Supervisors if student / HoD if staff / possibly others if indicated by conditions*

Figure S1. Research ethical approval.

Table S3. Students group Sustainability-themed influential factors for engineering career choice.

| Criteria Level weight | Criteria Level Rank | Sub-Criteria                         | Global Level weight | Global level rank |
|-----------------------|---------------------|--------------------------------------|---------------------|-------------------|
| Social-0.3447         | 2nd                 | SC10- Climate change                 | 0.1222              | 1 <sup>st</sup>   |
|                       |                     | SC9- Water quality/quantity          | 0.1214              | 2 <sup>nd</sup>   |
|                       |                     | SC5- Waste management                | 0.1052              | 3 <sup>rd</sup>   |
|                       |                     | SC6- Material consumption/energy use | 0.1037              | 4 <sup>th</sup>   |
| Economic-0.3084       | 3rd                 | SC8- Biodiversity                    | 0.1032              | 5 <sup>th</sup>   |
|                       |                     | SC7- Economic performance            | 0.0995              | 6 <sup>th</sup>   |
|                       |                     | SC1- Healthcare                      | 0.0983              | 7 <sup>th</sup>   |
| Environemental-0.3469 | 1st                 | SC4- Population problems             | 0.0833              | 8 <sup>th</sup>   |
|                       |                     | SC3-Housing conditions               | 0.0832              | 9 <sup>th</sup>   |
|                       |                     | SC2-Equity                           | 0.0798              | 10 <sup>th</sup>  |

Table S4. Professionals group Sustainability-themed influential factors for engineering career choice.

| Criteria Level weight | Criteria Level Rank | Sub-criteria                | Global Level weight | Global level rank |
|-----------------------|---------------------|-----------------------------|---------------------|-------------------|
| Social- 0.3417        | 2nd                 | SC9- Water quality/quantity | 0.1334              | 1st               |
|                       |                     | SC10- Climate change        | 0.1192              | 2nd               |
|                       |                     | SC8- Biodiversity           | 0.1105              | 3rd               |

|                      |     |                                      |        |      |
|----------------------|-----|--------------------------------------|--------|------|
|                      |     | SC5- Waste management                | 0.1078 | 4th  |
|                      |     | SC6- Material consumption/energy use | 0.1014 | 5th  |
| Economic- 0.2952     | 3rd | SC1- Healthcare                      | 0.0964 | 6th  |
|                      |     | SC7- Economic performance            | 0.0859 | 7th  |
|                      |     | SC3-Housing conditions               | 0.0855 | 8th  |
| Environmental-0.3631 | 1st | SC2-Equity                           | 0.0822 | 9th  |
|                      |     | SC4- Population problems             | 0.0775 | 10th |
